# Supplementary material
Source: publisher figshare collection journal article supplement (https://gsajournals.figshare.com/ndownloader/files/13390346)
Supplement: Supplementary file 1 [file 13390346]

**Figure S1**. MJ2 has the ability to form comparable olfactory short-term memory performance to the parental isoCJ1 strain in the standard Pavlovian task. Blue diamonds represent the mean. Red dots represent the outlier. (*p < 0.05 when compared to isoCJ1, n = 5–15 for all groups, one-way ANOVA followed by Bonferroni’s-corrected *post hoc* tests)
